# Supplementary material for: Exploring the characteristic “plug-in” configuration of an adsorbed starburst molecule
Source: Royal Society of Chemistry journal article supplement (doi:10.1039/d4cp01791a), 2024-01-01
Supplement: d4cp01791a1.pdf [file d4cp01791a1.pdf]

## Supporting Information

# Exploring the Characteristic “Plug-in” Configuration of an Adsorbed Starburst Molecule

*Xiaoyu Hao,<sup>†,#</sup> Yan Li,<sup>†,#</sup> Teng Zhang,<sup>†,\*</sup> Mengmeng Niu,<sup>†</sup> Huixia Yang,<sup>†</sup> Jingsi Qiao,<sup>†</sup>*

*Cesare Grazioli,<sup>‡</sup> Ambra Guarnaccio,<sup>††</sup>*

*Liwei Liu,<sup>†</sup> Quanzhen Zhang,<sup>†,\*</sup> Carla Puglia<sup>†††</sup> and Yeliang Wang<sup>†,\*</sup>*

<sup>†</sup> School of Integrated Circuits and Electronics & Yangtze Delta Region Academy, Beijing  
Institute of Technology (BIT), Beijing 100081, China.

<sup>‡</sup> IOM-CNR, Laboratorio TASC, Sincrotrone Trieste, Trieste 34149, Italy.

<sup>††</sup> CNR - Istituto di Struttura della Materia (ISM), Tito Scalo, Italy

<sup>†††</sup> Department of Physics and Astronomy, Uppsala University, Box 516, SE-751 20 Uppsala,  
Sweden

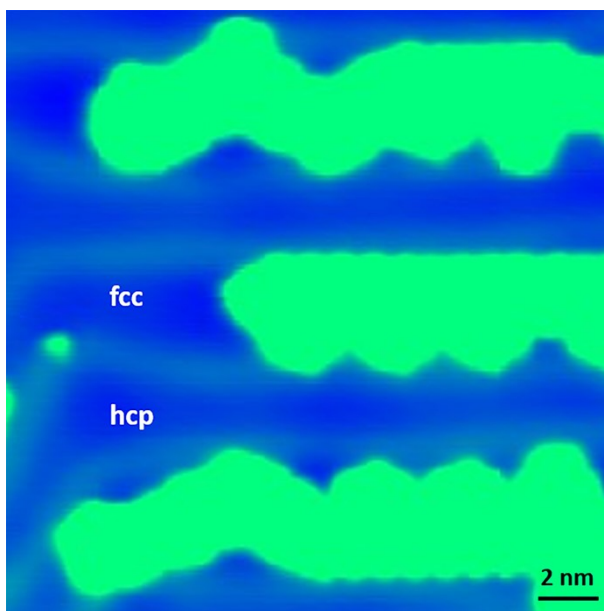

**Figure S1.** Highlighted STM image for herringbone reconstruction with alternating fcc and hcp regions of Au(111) surface. SBM molecules selectively adsorb on the fcc regions of Au(111).

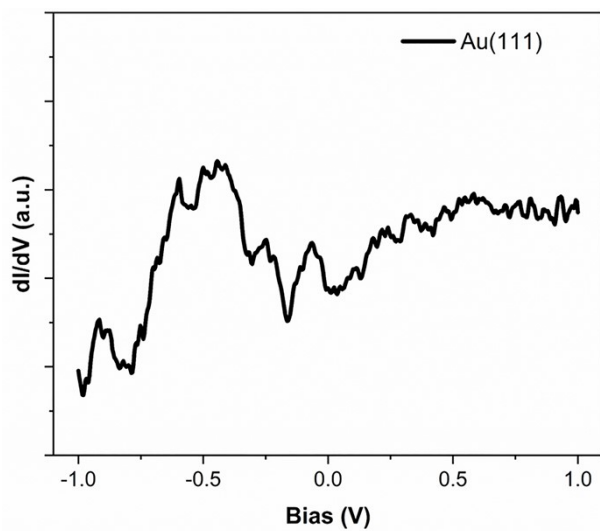

**Figure S2.** The  $dI/dV$  spectrum of Au(111) from -1 V to 1 V.

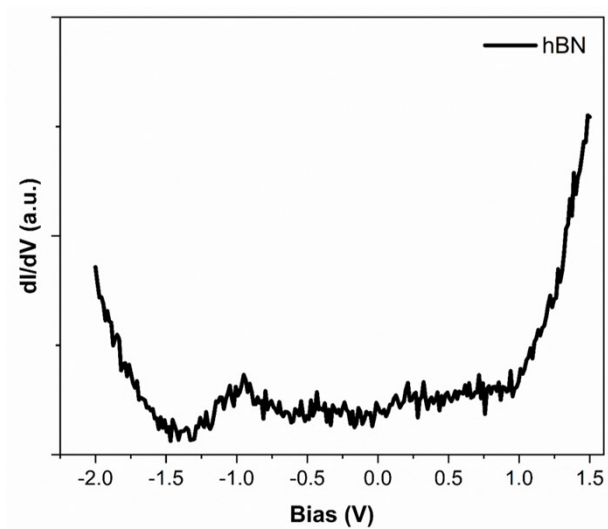

**Figure S3.** The  $dI/dV$  spectrum of hBN/Rh(111) from -2 V to 1.5 V.

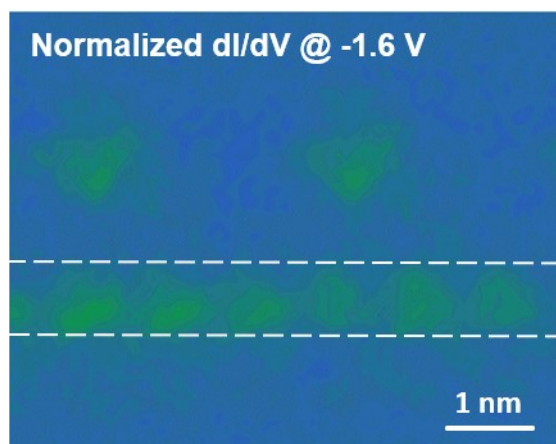

**Figure S4.** Normalized STS mapping at -1.6 V of SBM quasi-1D chain.
